# Supplementary material for: Prolonged Caloric Restriction in Obese Patients With Type 2 Diabetes Mellitus Decreases Plasma CETP and Increases Apolipoprotein AI Levels Without Improving the Cholesterol Efflux Properties of HDL
Source: PubMed Central journal article supplement — Diabetes Care. 2011 Nov 14;34(12):2576–80. doi: 10.2337/dc11-0685 (PMC3220857; doi:10.2337/dc11-0685), 2011-11-14

SUPPLEMENTARY DATA

**Supplementary Table 1. Changes in plasma CETP and (apo)lipoprotein values induced by 16 weeks of VLCD in obese patients with type 2 diabetes mellitus without or with an exercise program.** Changes ( $\Delta$ ) are calculated by subtracting values obtained after VLCD from those obtained at baseline. Data are presented as means  $\pm$  SEM. *P*-values are calculated using Unpaired Student's *t* test. CETP, cholesteryl ester transfer protein; VLCD, very low calorie diet; PL, phospholipids; LDL-C, low density lipoprotein-cholesterol; HDL-C, high density lipoprotein-cholesterol; HDL-PL, high density lipoprotein-phospholipids.

| Plasma parameters                  | Non-exercise<br>(n=14) | Exercise<br>(n=13) | <i>P</i> value |
|------------------------------------|------------------------|--------------------|----------------|
| $\Delta$ CETP ( $\mu\text{g/mL}$ ) | -0.41 $\pm$ 0.14       | -0.49 $\pm$ 0.23   | 0.7651         |
| $\Delta$ Total cholesterol (mM)    | -0.67 $\pm$ 0.34       | -0.86 $\pm$ 0.20   | 0.6356         |
| $\Delta$ Triglycerides (mM)        | -0.87 $\pm$ 0.19       | -1.32 $\pm$ 0.50   | 0.4128         |
| $\Delta$ Phospholipids (mM)        | -0.37 $\pm$ 0.08       | -0.45 $\pm$ 0.12   | 0.5822         |
| $\Delta$ LDL-C (mM)                | -0.64 $\pm$ 0.30       | -0.63 $\pm$ 0.24   | 0.9866         |
| $\Delta$ ApoB100 (mg/dL)           | -11.3 $\pm$ 7.4        | -26.8 $\pm$ 7.3    | 0.1477         |
| $\Delta$ HDL-C (mM)                | 0.00 $\pm$ 0.09        | 0.15 $\pm$ 0.06    | 0.1896         |
| $\Delta$ HDL-PL (mM)               | -0.03 $\pm$ 0.08       | 0.05 $\pm$ 0.05    | 0.4477         |
| $\Delta$ ApoAI (mg/dL)             | 34.5 $\pm$ 12.2        | 8.2 $\pm$ 11.3     | 0.1270         |

**Supplementary Figure 1. Correlation between cholesterol efflux and plasma lipids.** THP-1 cells were loaded with [<sup>3</sup>H]cholesterol and incubated for 4 h at 37°C with total plasma (1% v/v) obtained at baseline and after VLCD from 27 obese patients with T2DM. Cholesterol efflux rate was calculated by dividing <sup>3</sup>H-activity in the medium by the sum of the <sup>3</sup>H-radioactivity in the medium and cell extract. Cholesterol efflux was plotted against total cholesterol (TC, A), phospholipid (PL, B), HDL-C (C), HDL-PL (D), Non-HDL-C (E), and Non-HDL-PL (F), and correlations were calculated.

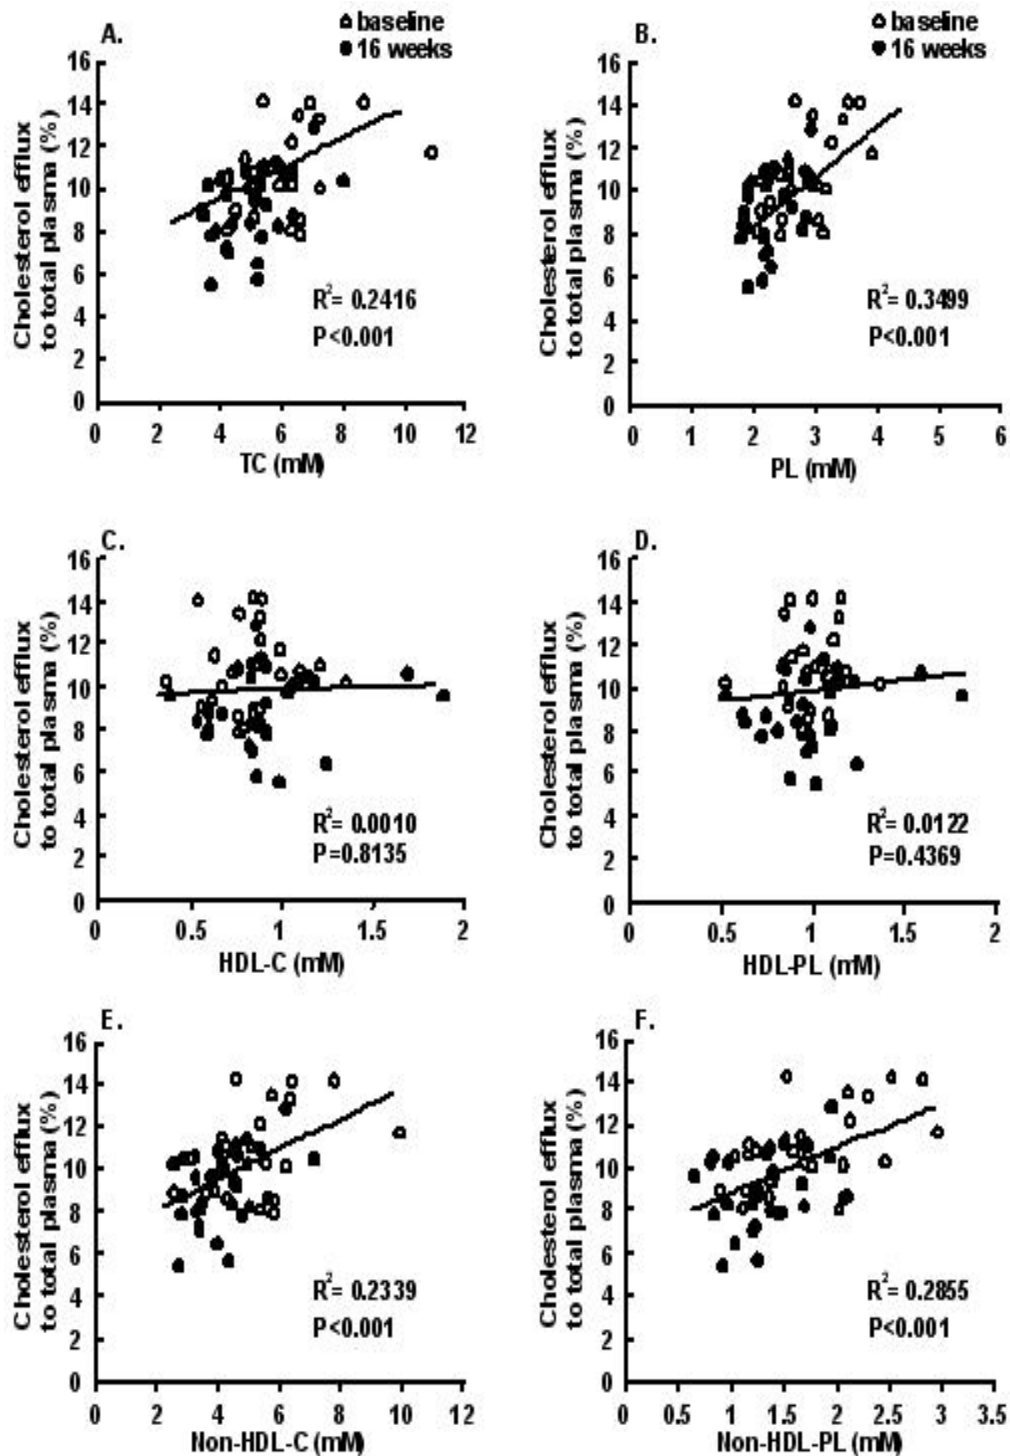

SUPPLEMENTARY DATA

**Supplementary Figure 2. Correlation between cholesterol efflux and plasma apoA1.** THP-1 cells were loaded with [<sup>3</sup>H]cholesterol and incubated for 4 h at 37°C with total plasma (1% v/v) obtained at baseline and after VLCD from 27 obese patients with T2DM.. Cholesterol efflux rate was calculated by dividing <sup>3</sup>H-activity in the medium by the sum of the <sup>3</sup>H-radioactivity in the medium and cell extract. Cholesterol efflux was plotted against apoA1, and correlations were calculated.

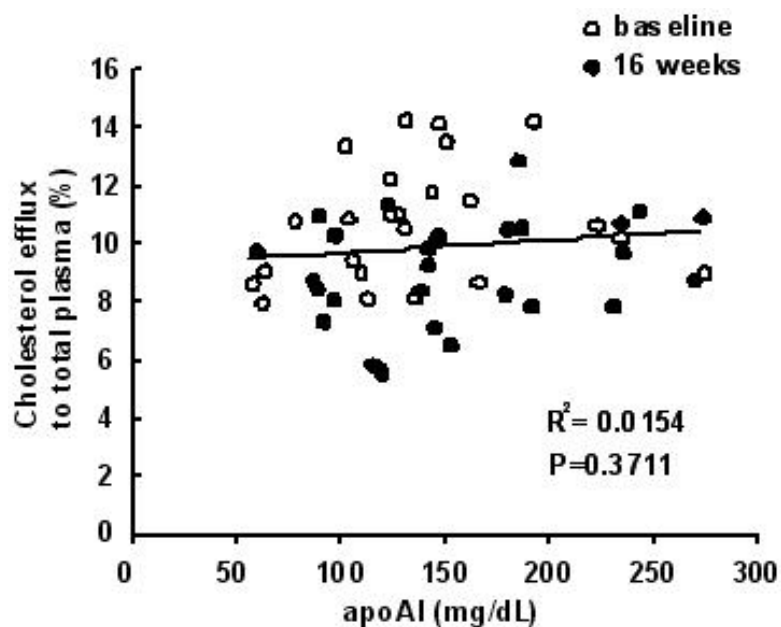

Supplement: supp_dc11-0685v110685_DC110685SupplementaryData.pdf [file supp_dc11-0685v110685_DC110685SupplementaryData.pdf]
